# Supplementary material
Source: PubMed Central journal article supplement (PMC3431691)
Supplement: supp_M112.381566_jbc.M112.381566-1.pdf [file supp_M112.381566_jbc.M112.381566-1.pdf]

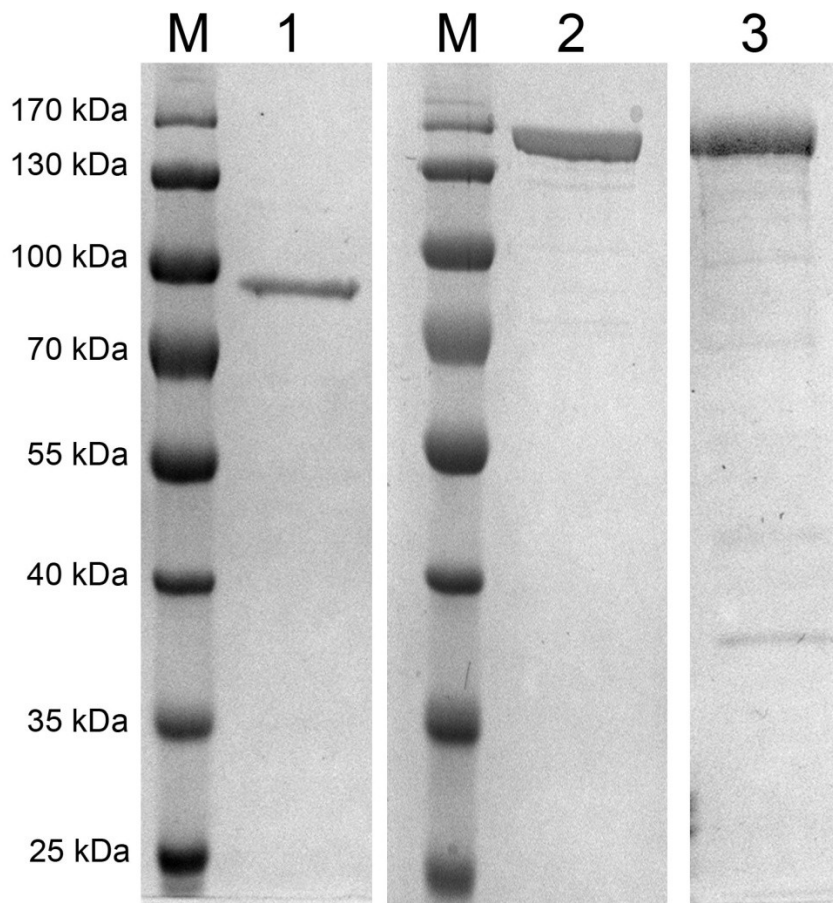

**Figure S1. Purification of recombinant catalase-peroxidase, pln and pln<sup>in</sup>**

CBB stained SDS-PAGE gels showing purified, recombinant catalase-peroxidase (after tev cleavage of GST and subsequent purification with size exclusion chromatography) **(1)**, pln<sup>in</sup> **(2)** and pln **(3)**.

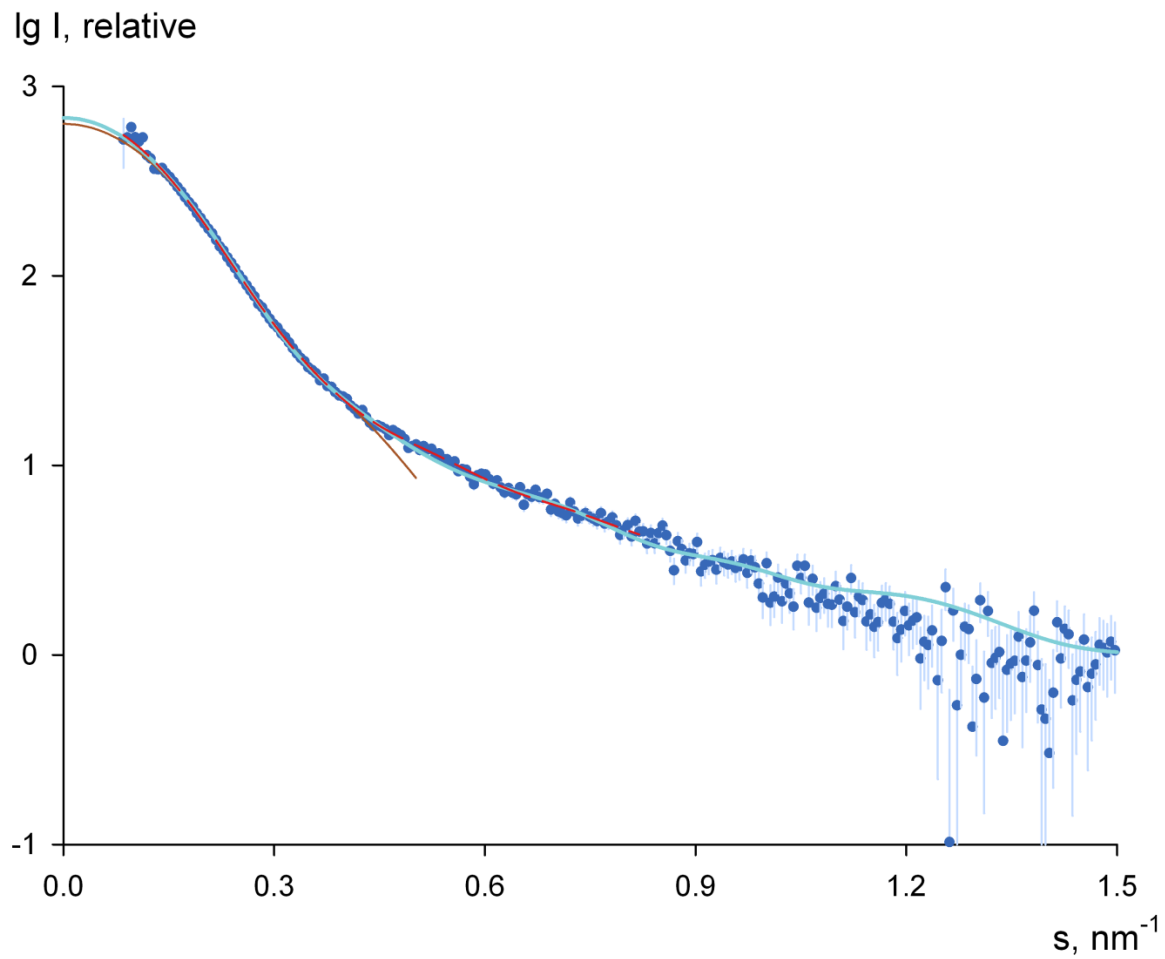

**Figure S2. The processed and merged SAXS pattern from  $pln^{in}$**

Processed solution scattering pattern from  $pln^{in}$ ; experimental data (dots with error bars, dark blue), calculated fits from ellipsoid (brown), DAMMIF model (red) and BUNCH (light blue).

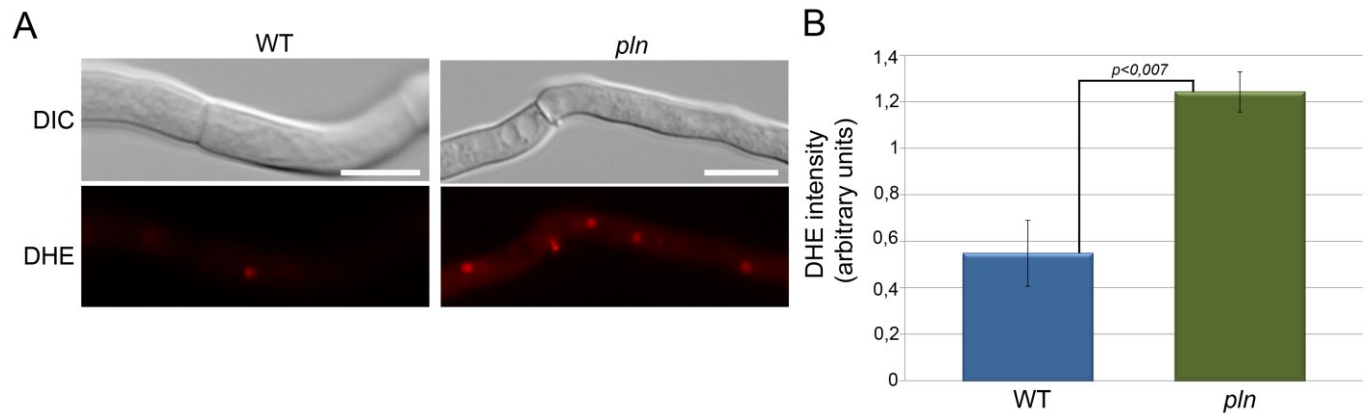

**Figure S3. Lack of peroxisomal Lon protease results in enhanced oxidative stress. (A)** Fluorescence microscopy images showing dihydroethidium bromide (DHE) stained wild-type (WT) and *pln* cells grown for 120 h in PEN medium. *Pln* cells show enhanced DHE fluorescence relative to the wild-type control. The scale bars represent 5 μm. **(B)** Quantification of DHE fluorescence intensities from cells shown in Fig. 3AS. Error bars represent SEM.

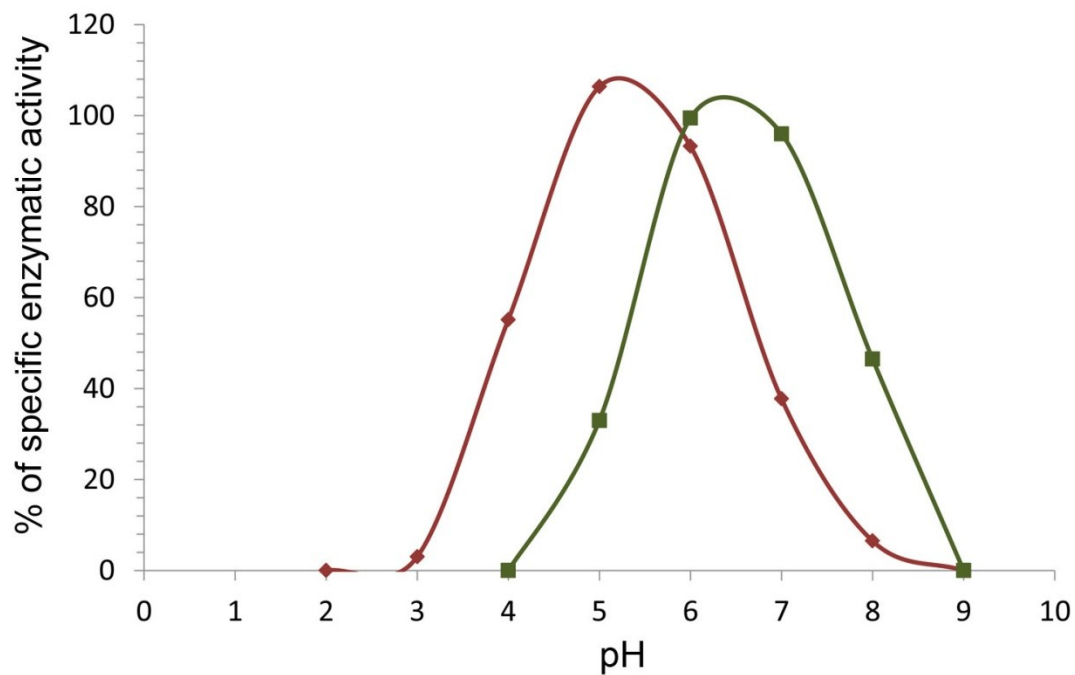

**Figure S4. Catalatic and peroxidatic activities of catalase-peroxidase at different pH values**

The catalatic activity (green) and peroxidatic activity (red) of catalase-peroxidase were determined at 25°C at pH values ranging from 2.0 to 9.0. The highest specific peroxidatic and catalatic activities were arbitrarily set at 100 %.

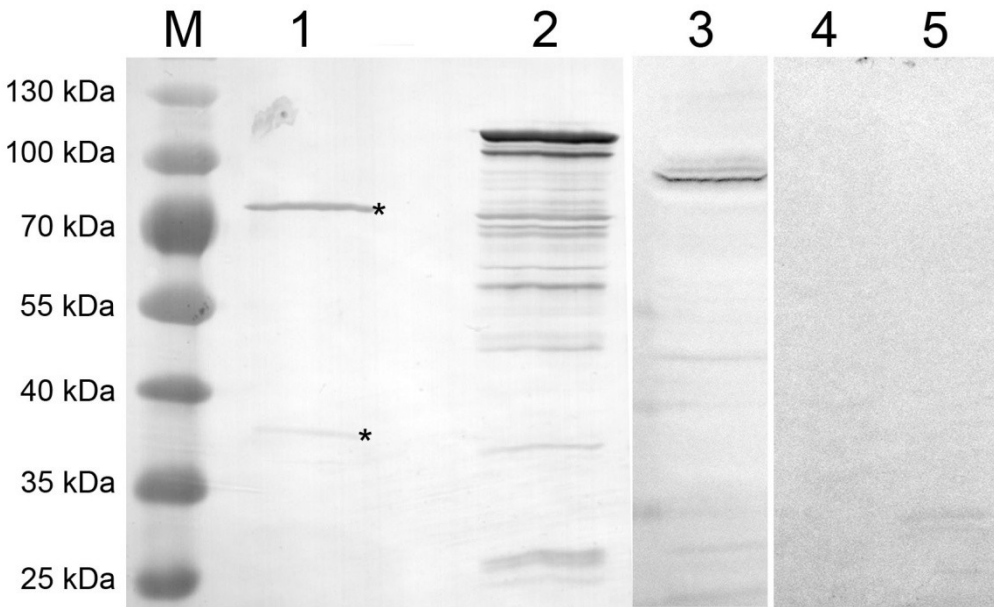

**Figure S5. Rabbit polyclonal antisera specifically recognizing catalase-peroxidase from *P. chrysogenum***

Western blots showing crude extracts of the empty *E. coli* Rosetta 2 strain (1), *E. coli* Rosetta 2 strain expressing GST-catalase-peroxidase (2,5), *P. chrysogenum* wild-type (3,4). Lane 4 and 5 were decorated with pre-immune sera. Lanes 1, 2 and 3 were decorated with rabbit polyclonal antisera raised against catalase-peroxidase from *P. chrysogenum*. Both GST-catalase-peroxidase (~ 100 kDa) expressed in *E. coli* as well as endogenous catalase-peroxidase (~ 80 kDa) are specifically recognized by this antiserum. The 80 kDa protein band detected in the empty *E. coli* Rosetta 2 strain (lane 1) most likely represents bacterial catalase-peroxidase, which shares 80 % sequence homology with catalase-peroxidase from *P. chrysogenum*.
